# Supplementary material
Source: PubMed Central journal article supplement (PMC3957631)
Supplement: AEM.03375-13_zam999105193so1.pdf [file AEM.03375-13_zam999105193so1.pdf]

**Table S1. Specific primer pairs used in quantitative Real-time PCR experiments.**

| Name              | Sequences (5' → 3')       | Gene                                                                             |
|-------------------|---------------------------|----------------------------------------------------------------------------------|
| PR1-fw1           | CCTCAAGATTATCTTAACGCTC    | Pathogenesis-related 1 ( <i>PR1</i> )                                            |
| PR1-rev1          | TACCATTGCTTCTCATCAACC     |                                                                                  |
| ICS1-fw1          | GTTCCCTCTCCAAGAAATGTCC    | Isochorismate synthase 1 ( <i>ICS1</i> )                                         |
| ICS1-rev1         | TCCTTCAAGGTCATCAAATC      |                                                                                  |
| LOX f             | GCCTCTCTTCTTGATGGA        | Lipoxygenase 1 ( <i>Lox1</i> )                                                   |
| LOX r             | GTAGTGAGCCACTTCTCCAA      |                                                                                  |
| EIN2 f            | GTTGCTAAGTGATGCTGTA       | Ethylene-insensitive 2 ( <i>EIN2</i> )                                           |
| EIN2 r            | CGCTCAAGCATGCTGGGCC       |                                                                                  |
| AREB-fw1          | GCTCAACAGGAGGGAGTGG       | Abscisic acid-responsive element binding transcription factor 2 ( <i>AREB2</i> ) |
| AREB-rev1         | CATCAACAGTCTTATGACTCAG    |                                                                                  |
| APX1-fw1          | GGTCTTGACATTGCTCTCA       | Ascorbate peroxidase 1 ( <i>APX1</i> )                                           |
| APX1-rev1         | CTGGTGGCTCTGGCTTGTC       |                                                                                  |
| SOS1-fw1          | GGTGGACTTCTAAGCGCTAC      | Salt overly sensitive 1 ( <i>SOS1</i> )                                          |
| SOS1-rev1         | GAAATTAGATGACAGCTCCCC     |                                                                                  |
| Actin-fw          | CACCACTGCTGAACGGGAA       | Actin                                                                            |
| Actin-rev         | GGAGCTGCTCCTGGCACTTT      |                                                                                  |
| ABC-fw2           | CGAGACGTACCATGGCCAGAT     | ABC transporter                                                                  |
| ABC-rev2          | CTCGTTGAGCGTTGTCGGACT     |                                                                                  |
| Alcohol DH-fw     | GCCGAATTTCTTCTTGAACCTACCT | Alcohol dehydrogenase                                                            |
| Alcohol DH-rev    | GAATTGTAGCCGCCTCATCC      |                                                                                  |
| CSRP-fw           | CCCCTGTACTTACCAGGAGTA     | Cellulose signaling related protein                                              |
| CSRP-rev          | GTAAGAGTTGCCGACAATGCC     |                                                                                  |
| DH red-fw2        | TTGAGAGAGTCCTGGTAGTCG     | Short-chain dehydrogenase reductase                                              |
| DH red-rev2       | AACGCTTGCTTCGACGATATCG    |                                                                                  |
| PG mutase-fw      | AGGTTACCGAGCGACCTCACG     | Phosphoglycerate mutase                                                          |
| PG mutase-rev     | AATGACACCGGCGAGGATCTC     |                                                                                  |
| MAT-fw            | CATAAACGACCCGAACCGAC      | Malic acid transporter                                                           |
| MAT-rev           | TATACGACTAAGCCAATCACCT    |                                                                                  |
| MFS-fw            | GTGTCATTCTCATGGCTGGT      | Major facilitator superfamily transporter                                        |
| MFS-rev           | TGATGAATCGAGTGAAGAAGGAG   |                                                                                  |
| Monooxygenase-fw  | CACTGGAGTCATGACACAGC      | Steroid monooxygenase                                                            |
| Monooxygenase-rev | GTCGACAATGTCCTTCTTCCA     |                                                                                  |
| p450-fw           | GGGACATTATTCGGGAGAGG      | Cytochrome p450 monooxygenase                                                    |
| p450-rev          | GATGATGAAAGCCGATGACAG     |                                                                                  |
| Tubulin-fw        | GAATATCAACAATACCAGGATGC   | $\beta$ -tubulin                                                                 |
| Tubulin-rev       | AGGATTGGTATTGATCATCAGCA   |                                                                                  |

**Table S2. *Trichoderma parareesei* T6 physiological processes differentially expressed in response to the presence of tomato plants in the culture medium.**

| <b>Up-regulated</b>                |                                                                 |                         |                                                           |
|------------------------------------|-----------------------------------------------------------------|-------------------------|-----------------------------------------------------------|
| <b>Processes</b>                   | <b>Probe sets</b>                                               | <b>Probe set number</b> | <b>Orthologous numbering</b>                              |
| Metabolism                         |                                                                 |                         |                                                           |
| Carbohydrate                       | Endopolygalacturonase                                           | 1                       | Trire2_103049                                             |
|                                    | Glucan 1,4- $\alpha$ -glucosidase                               | 1                       | Trire2_105313                                             |
| Lipid and fatty acid               | Phospholipase                                                   | 1                       | Trire2_3434                                               |
| Secondary                          | Chimeric spermidine synthase/saccharopine dehydrogenase         | 1                       |                                                           |
|                                    | Quinate dehydrogenase                                           | 1                       | Trire2_109687                                             |
|                                    | Non-ribosomal peptide synthase- like enzyme                     | 1                       | Trire2_71072                                              |
| Energy                             | Aldehyde dehydrogenase                                          | 1                       |                                                           |
|                                    |                                                                 |                         |                                                           |
| Cellular processes and signaling   |                                                                 |                         |                                                           |
| Transport                          | General substrates (Major Facilitator Superfamily transporters) | 2                       | Trire2_54999<br>Trire2_71059                              |
|                                    | ABC transporters                                                | 2                       | Trire2_80028<br>Trive_36031                               |
| Posttranslational events           | 26S proteasome regulatory complex                               | 1                       | Trive_111074                                              |
| Secretion                          | Mitochondrial import translocase                                | 1                       | Trive_89707                                               |
| Cell wall and membranes            | Integral membrane protein                                       | 2                       | Trire2_105251<br>Trive_36530                              |
| Signaling                          | Ankyrin repeat protein                                          | 2                       | Trire2_104219<br>Trire2_36373                             |
|                                    | Cellulose signaling related protein                             | 1                       | Trire2_50323                                              |
|                                    |                                                                 |                         |                                                           |
| Information storage and Processing |                                                                 |                         |                                                           |
| Transcription                      | Transcription factors                                           | 4                       | Trire2_122448<br>Trire2_27649<br>Trive_12973<br>Trive_501 |

|                                        |                                                  |                         |                                              |
|----------------------------------------|--------------------------------------------------|-------------------------|----------------------------------------------|
| Translation (protein synthesis)        | Translational initiation factor 2 $\beta$        | 1                       |                                              |
|                                        |                                                  |                         |                                              |
| Unknown function                       |                                                  | 10                      | *                                            |
| <b>Down-regulated</b>                  |                                                  |                         |                                              |
| <b>Processes</b>                       | <b>Probe sets</b>                                | <b>Probe set number</b> | <b>Orthologous numbering</b>                 |
| Metabolism                             |                                                  |                         |                                              |
| Carbohydrate                           | $\beta$ -galactosidase                           | 2                       |                                              |
|                                        | Phosphoglycerate mutase                          | 16                      | Trire2_121350<br>Trive_73471                 |
|                                        | Glycoside hydrolase (chitinase)                  | 1                       | Trire2_102837                                |
|                                        | Alginate-lyase                                   | 1                       | Trire2_103033                                |
|                                        | Polygalacturonase                                | 1                       | Trire2_122780                                |
|                                        | $\beta$ -mannosidase                             | 1                       | Trire2_5836                                  |
|                                        | Short-chain dehydrogenase/reductase              | 3                       | Trire2_60518<br>Trire2_69181<br>Trire2_80019 |
|                                        | Glucose dehydrogenase                            | 1                       | Trire2_66795                                 |
|                                        | 6-phosphofructo-2-kinase                         | 1                       | Trire2_78732                                 |
|                                        | 2-hydroxy-3-oxopropionate reductase              | 1                       | Trire2_66544                                 |
| Lipid and fatty acid                   | Phosphatidylserine decarboxylase                 | 3                       | Trire2_29642<br>Trire2_66935                 |
|                                        | Fusicocadiene synthase                           | 1                       | Trire2_107667                                |
|                                        | Esterase/lipase                                  | 1                       | Trire2_107835                                |
|                                        | Acyl-CoA synthase                                | 1                       | Trire2_54667                                 |
|                                        | Secretory phospholipase                          | 1                       | Trire2_67579                                 |
| Amino acid                             | S-adenosylmethionine dependent methyltransferase | 2                       | Trire2_111082<br>Trire2_5633                 |
|                                        | Aromatic amino acid aminotransferase             | 1                       | Trire2_105978                                |
|                                        | Homoserine dehydrogenase                         | 1                       | Trire2_122868                                |
|                                        | Aspartate kinase                                 | 1                       | Trire2_81896                                 |
| Protein                                | Proteasome component (endopeptidase)             | 1                       | Trive_85569                                  |
|                                        | Serine-type endopeptidase inhibitor              | 1                       | Trire2_110790                                |
| Nucleotide and nucleic acid metabolism | Pyrimidine biosynthesis enzyme                   | 2                       | Trire2_121620                                |
|                                        | Oxidoreductase 2-                                | 1                       | Trire2_123468                                |

|                                  |                                                                 |    |                                                |
|----------------------------------|-----------------------------------------------------------------|----|------------------------------------------------|
|                                  | nitropropane dioxygenase                                        |    |                                                |
|                                  | Phosphoribosyl transferase                                      | 1  | Trire2_55837                                   |
|                                  | Endoribonuclease L-PSP                                          | 1  | Trire2_75424                                   |
|                                  | Deoxyuridine 5'-triphosphate nucleotidohydrolase                | 1  | Trire2_75529                                   |
| Vitamin                          | Thiamin biosynthesis protein                                    | 1  | Trire2_59068                                   |
|                                  | Vitamin b12 biosynthesis protein                                | 1  | Trire2_74681                                   |
|                                  | C-14 sterol reductase                                           | 1  | Trire2_81049                                   |
| Secondary                        | Non-ribosomal peptide synthase- like enzyme                     | 1  | Trire2_23171                                   |
|                                  | Prenyltransferase                                               | 1  | Trire2_70040                                   |
|                                  | Isoflavone reductase                                            | 3  | Trire2_109239<br>Trire2_111832<br>Trire2_81525 |
|                                  | Longiborneol synthase                                           | 1  | Trire2_67738                                   |
| Energy                           | NADH:flavin oxidoreductase                                      | 1  | Trire2_103015                                  |
|                                  | FMN-dependent dehydrogenase                                     | 1  | Trire2_103136                                  |
|                                  | Flavin oxidoreductase                                           | 1  | Trire2_122416                                  |
|                                  | Alcohol dehydrogenase                                           | 1  | Trire2_30759                                   |
|                                  | Dynamin GTPase                                                  | 2  | Trire2_61605<br>Trire2_68192                   |
|                                  | ATPase                                                          | 1  | Trire2_74187                                   |
|                                  | FAD-dependent pyridine nucleotide-disulphide oxidoreductase     | 1  | Trire2_77288                                   |
|                                  | Aldo-keto reductase                                             | 1  | Trire2_82204                                   |
| Inorganic                        | Ferric reductase                                                | 3  | Trire2_111750<br>Trire2_22845<br>Trire2_23353  |
| Nitrogen compounds               | Urease accessory protein UreD                                   | 1  | Trire2_53187                                   |
|                                  |                                                                 |    |                                                |
| Cellular processes and signaling |                                                                 |    |                                                |
| Transport                        | General substrates (Major Facilitator Superfamily transporters) | 16 | Trire2_105752<br>Trire2_106556                 |

|                |                                                      |   |                                                                                                                                                                              |
|----------------|------------------------------------------------------|---|------------------------------------------------------------------------------------------------------------------------------------------------------------------------------|
|                |                                                      |   | Trire2_26160<br>Trire2_28409<br>Trire2_43347<br>Trire2_53903<br>Trire2_54972<br>Trire2_55630<br>Trire2_57749<br>Trire2_69026<br>Trire2_69164<br>Trire2_69834<br>Trire2_80058 |
|                | Aquaporin transporter                                | 1 | Trire2_105870                                                                                                                                                                |
|                | Copper transporter                                   | 2 | Trire2_52315<br>Trire2_71029                                                                                                                                                 |
|                | Hemolysin III channel protein                        | 2 | Trire2_68212<br>Trire2_82246                                                                                                                                                 |
| Detoxification | Cytochrome-c oxidase chain VI precursor              | 1 |                                                                                                                                                                              |
|                | Cytochrome p450 monooxygenase                        | 6 | Trire2_109811<br>Trire2_4999<br>Trire2_58772<br>Trire2_70984<br>Trire2_77512<br>Trire2_78223                                                                                 |
|                | ADP-ribose pyrophosphatase                           | 1 | Trire2_104200                                                                                                                                                                |
|                | Chloroperoxidase                                     | 1 | Trire2_123079                                                                                                                                                                |
|                | Glutathione-dependent formaldehyde-activating enzyme | 1 | Trire2_123987                                                                                                                                                                |
|                | Glutathione S-transferase                            | 1 | Trire2_22453                                                                                                                                                                 |
|                | Monooxygenase FAD-binding protein                    | 2 | Trire2_53430                                                                                                                                                                 |

|                          |                                                                                |   |                             |
|--------------------------|--------------------------------------------------------------------------------|---|-----------------------------|
|                          |                                                                                |   | Trire2_76905                |
|                          | β-lactamase                                                                    | 1 | Trire2_58717                |
|                          | Flavin-dependent halogenase O-methyltransferase bifunctional protein           | 1 | Trire2_69652                |
|                          | Catalase/peroxidase                                                            | 1 | Trire2_70803                |
|                          | Steroid monooxygenase                                                          | 1 | Trire2_76230                |
|                          | Agmatine deiminase                                                             | 1 | Trire2_80980                |
|                          | RTA1 domain protein                                                            | 1 | Trire2_41325                |
|                          | Acid-phosphatase                                                               | 2 | Trire2_76155<br>Trive_87714 |
| Posttranslational events | Protein disulfide isomerase                                                    | 1 |                             |
|                          | Glutamate carboxypeptidase                                                     | 1 |                             |
|                          | Thiorredoxin-like protein                                                      | 1 | Trire2_120922               |
|                          | Similar to tripeptidyl-peptidase                                               | 1 | Trire2_123865               |
|                          | Aspartic protease                                                              | 1 | Trire2_53961                |
|                          | 26S proteasome non-ATPase regulatory subunit 9                                 | 1 | Trire2_56215                |
|                          | related to histone-lysine N-methyltransferase                                  | 1 | Trire2_56354                |
|                          | Radical S-adenosyl methionine domain containing protein                        | 1 | Trire2_64288                |
| Adhesion                 | Fasciclin                                                                      | 1 | Trire2_121417               |
| Cell communication       | Hydrophobin                                                                    | 1 | Trire2_73173                |
| Cell wall and membranes  | Integral membrane protein                                                      | 1 | Trire2_69500                |
|                          | Cell wall protein                                                              | 1 | Trire2_105763               |
| Signaling                | WD-repeat containing protein probably involved in G-protein mediated signaling | 1 | Trire2_30465                |
|                          | Ankyrin repeat protein                                                         | 1 | Trire2_35186                |
|                          | G-protein coupled receptor                                                     | 1 | Trire2_38672                |
|                          | Casein kinase II/ser/thr protein kinase                                        | 1 | Trire2_5127                 |
|                          | Casein kinase I, subunit delta                                                 | 1 | Trire2_55049                |
|                          | Regulator of G protein signaling                                               | 1 | Trire2_63981                |
| Regulation               | Phosphotyrosyl phosphatase activator (serine/threonine protein                 | 1 | Trire2_79850                |

|                                    |                                            |    |                                                                                                                                                                  |
|------------------------------------|--------------------------------------------|----|------------------------------------------------------------------------------------------------------------------------------------------------------------------|
|                                    | phosphatase activator)                     |    |                                                                                                                                                                  |
|                                    |                                            |    |                                                                                                                                                                  |
| Information storage and Processing |                                            |    |                                                                                                                                                                  |
| Replication                        | DNA replication complex                    | 1  | Trive_44614                                                                                                                                                      |
| Transcription                      | DNA-dependent RNA polymerase II            | 1  |                                                                                                                                                                  |
|                                    | DNA-directed RNA polymerase III            | 1  | Trive_66115                                                                                                                                                      |
|                                    | Transcription factors                      | 11 | Trire2_102673<br>Trire2_106625<br>Trire2_111742<br>Trire2_112131<br>Trire2_58011<br>Trire2_68455<br>Trire2_69695<br>Trire2_76220<br>Trire2_77878<br>Trire2_79726 |
|                                    | tRNAHis guanylyltransferase                | 1  | Trire2_64065                                                                                                                                                     |
| Translation (protein synthesis)    | GTP-dependent nucleic acid-binding protein | 1  | Trive_82125                                                                                                                                                      |
| Repair                             | Smr domain protein                         | 1  | Trire2_56603                                                                                                                                                     |
|                                    | DNA repair protein                         | 1  | Trire2_70084                                                                                                                                                     |
|                                    |                                            |    |                                                                                                                                                                  |
| Unknown function                   |                                            | 68 | **                                                                                                                                                               |

These physiological processes grouped the 250 differentially expressed probe sets (FC $\geq$ 2 and FDR 0.10), up- and down-regulated, identified in *T. parareesei* T6 in the presence of the plants after Gene Spring GX program analysis.

\* Trire2\_107869, Trire2\_120362, Trire2\_122724, Trire2\_122825, Trire2\_1927, Trive\_59121.

\*\* Trire2\_102908, Trire2\_103048, Trire2\_104549, Trire2\_104838, Trire2\_105156,  
Trire2\_105311, Trire2\_105445, Trire2\_106353, Trire2\_106490, Trire2\_106584,  
Trire2\_106623, Trire2\_107793, Trire2\_107901, Trire2\_108261, Trire2\_108996,  
Trire2\_109243, Trire2\_109960, Trire2\_110496, Trire2\_111251, Trire2\_111494,  
Trire2\_111764, Trire2\_112040, Trire2\_112459, Trire2\_112520, Trire2\_119857,  
Trire2\_121415, Trire2\_121427, Trire2\_122374, Trire2\_122971, Trire2\_123261,  
Trire2\_123429, Trire2\_22426, Trire2\_33359, Trire2\_33827, Trire2\_2433,  
Trire2\_39426, Trire2\_43115, Trire2\_53747, Trire2\_54230, Trire2\_34297, Trire2\_5924,  
Trire2\_59368, Trire2\_60493, Trire2\_63157, Trire2\_63526, Trire2\_64011,  
Trire2\_64898, Trire2\_66788, Trire2\_69650, Trire2\_69841, Trire2\_70967,  
Trire2\_71123, Trire2\_71851, Trire2\_76075, Trire2\_77887, Trire2\_82041,  
Trire2\_82049, Trive\_34614, Trive\_43202, Trive\_43411, Trive\_59385, Trire2\_59703.



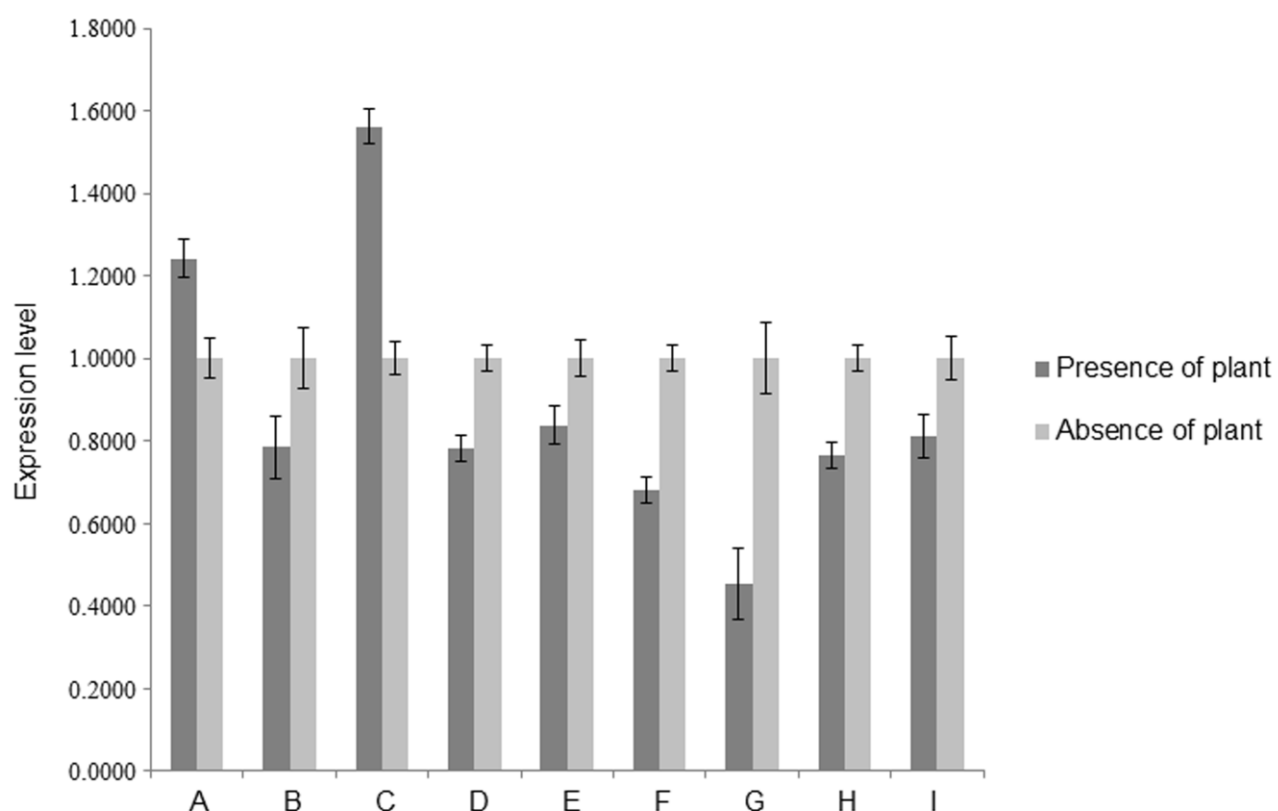

**Figure S1. Validation of microarray experiments.** Real-time PCR of an ABC transporter (Trire2\_80028) (A), an alcohol dehydrogenase (Trire2\_30759) (B), a cellulose signaling-related gene (Trire2\_50323) (C), a dehydrogenase reductase (Trire2\_69181) (D), two MFS transporters (Trire2\_105752 and Trire2\_106556) (E and F), a phosphoglycerate mutase (Trire2\_121350) (G), a steroid monooxygenase (Trire2\_76230) (H) and a cytochrome P450 monooxygenase (Trire2\_4999) (I) genes in *Trichoderma parareesei* T6 after 20 h of incubation in the presence of tomato plants. Values correspond to relative measurements against T6 incubated without plant ( $2^{-\Delta\Delta C_t} = 1$ ). The *Trichoderma*  $\beta$ -tubulin gene was used as an internal reference gene. Bars represent standard deviations of the mean values of three biological replicates.

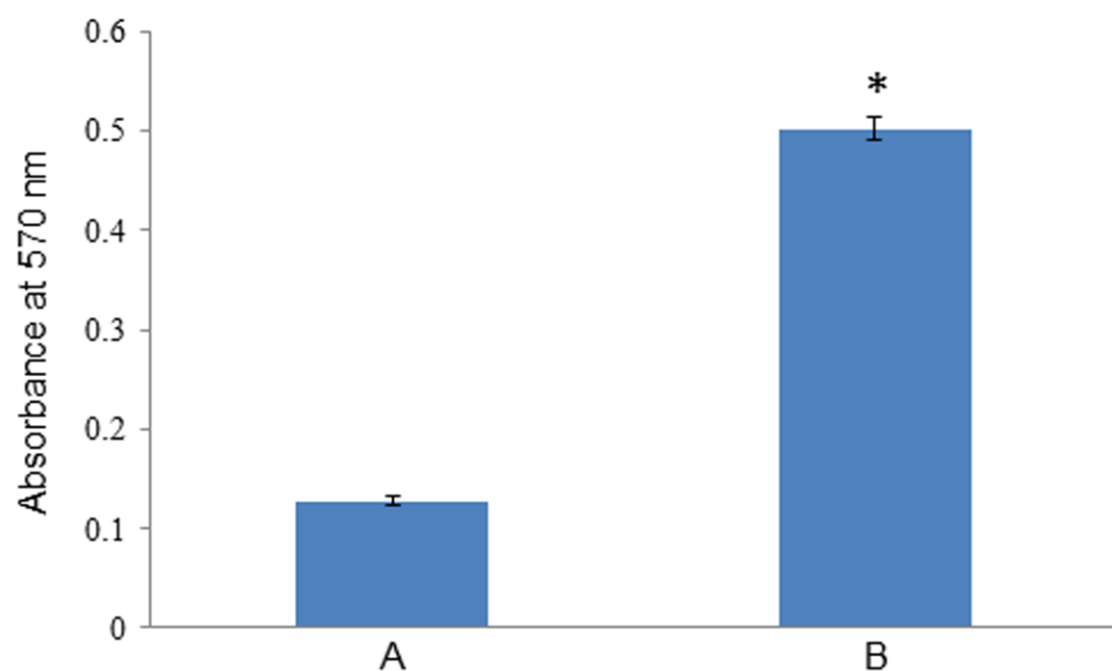

**Figure S2. Effect of tomato exudates on *Trichoderma parareesei* T6 growth.** Absorbance values at 570 nm were measured after the inoculation of 96-well E plates with 2,000 conidia of T6 per well containing MS medium + 1% sucrose (control) (A) or MS medium + 1% sucrose plus tomato exudates (B) and incubation at 28°C for 120 h.

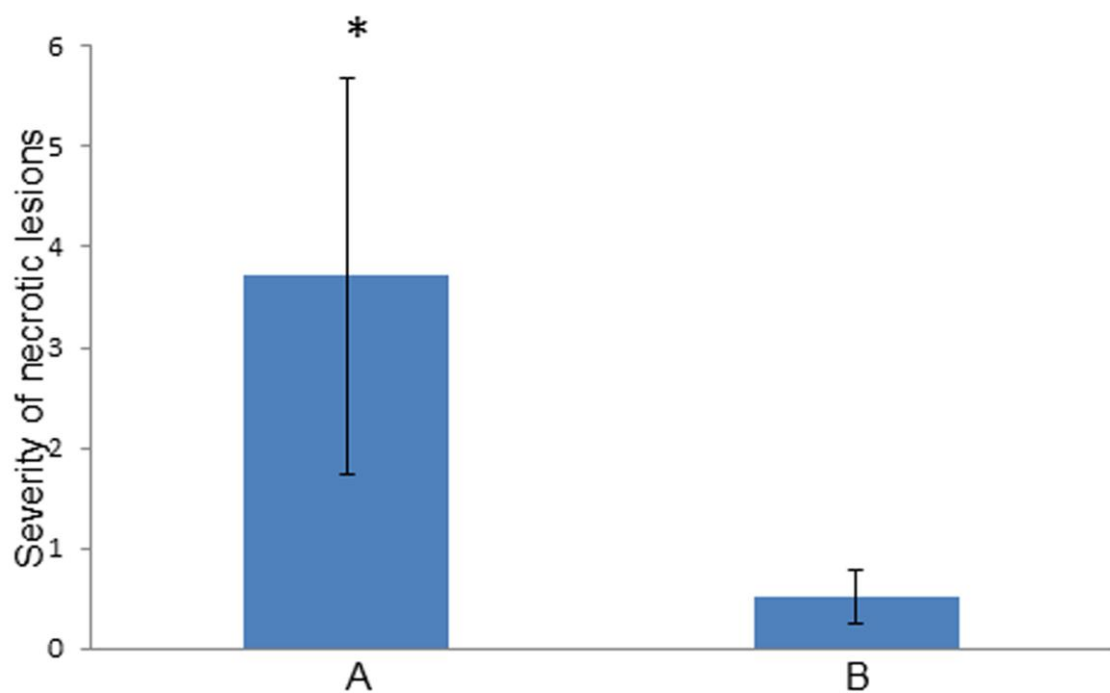

**Figure S3.** Severity of necrotic lesions observed in tomato leaves 3 days after *Trichoderma parareesei* T6 treatment of 4-week old tomato plants and *Botrytis cinerea* B05.10 conidia infection. Untreated (A) and T6-treated plants (B). Necrotic lesion data were recorded 4 days after *B. cinerea* infection. The standard deviation bars were obtained from at least two different experiments, with eight replicates of infection spots. Asterisk represents statistically significant differences (Duncan's test).

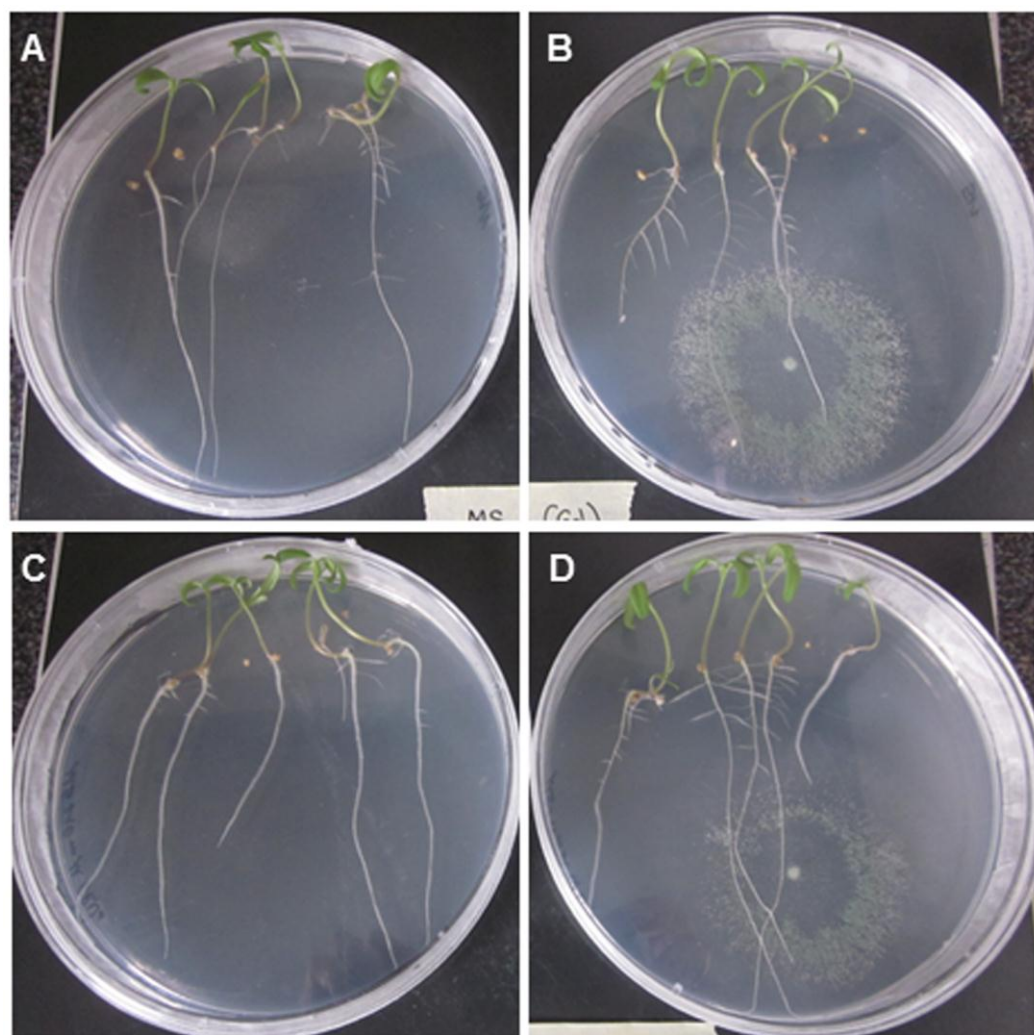

**Figure S4. Effect of *Trichoderma parareesei* T6 and salt-stress treatments on tomato plant growth in an *in vitro* assay.** Tomato seedlings grown on MS medium, supplemented with 1% (w/v) sucrose and 0.8% agar, pH 5.7 (A and B) plus 25 mM NaCl (C and D) were inoculated with water (A and C) or *T. parareesei* T6 (B and D). Photographs were taken 4 days after inoculating  $1 \times 10^6$  *Trichoderma* spores.

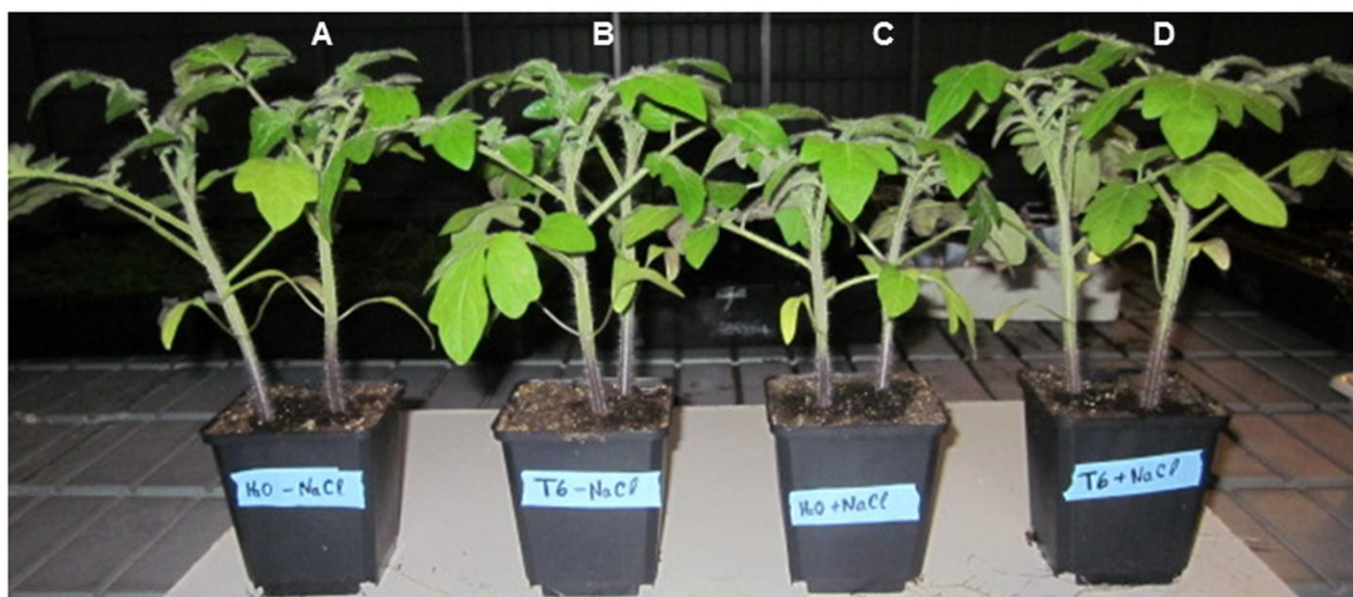

**Figure S5. Effect of *Trichoderma parareesei* T6 and salt-stress treatments on the growth of tomato plants in an *in vivo* assay.** Image of 4-week-old tomato plants developed from untreated (A and C) or *T. parareesei* T6-treated (B and D) seeds, treated daily with 5 mL of either water (A and B) or 100 mM NaCl (C and D) for 10 days.
